# Supplementary material for: Collagen X Is Dispensable for Hypertrophic Differentiation and Endochondral Ossification of Human iPSC‐Derived Chondrocytes
Source: PubMed Central journal article supplement (PMC10184020; doi:10.1002/jbm4.10737), 2023-03-29
Supplement: JBM4-7-e10737-s001.pdf [file JBM4-7-e10737-s001.pdf]

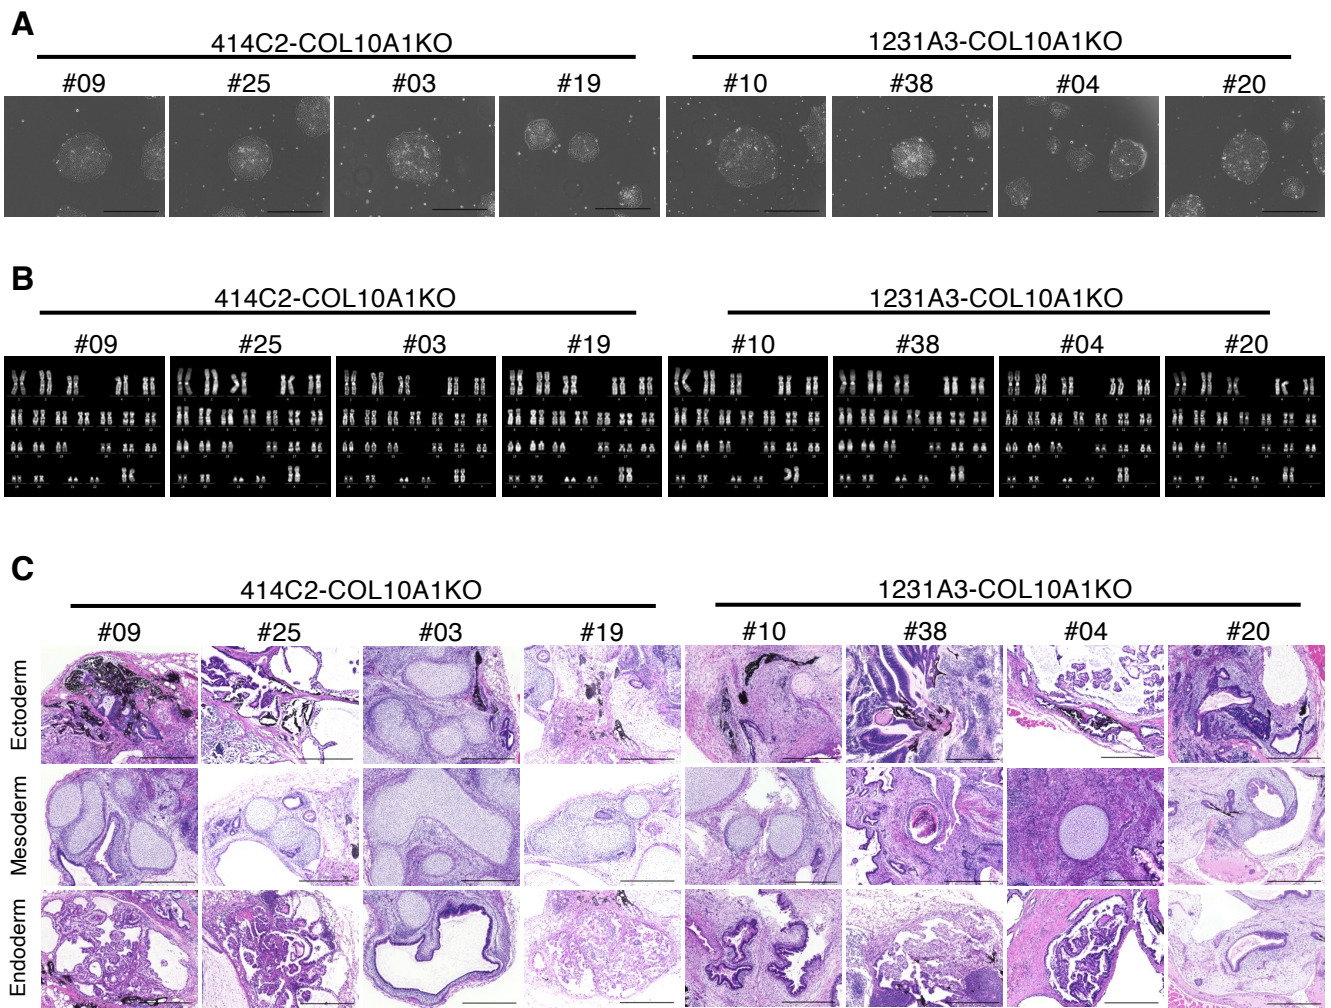

**Figure S1.** Validation of stem cell features of *COL10A1*<sup>+/-</sup> and *COL10A1*<sup>-/-</sup> iPSCs. (A) Morphology of colonies by phase contrast images. (B) Karyotype by Q-banding. (C) Histological findings of three germ layers in teratomas.

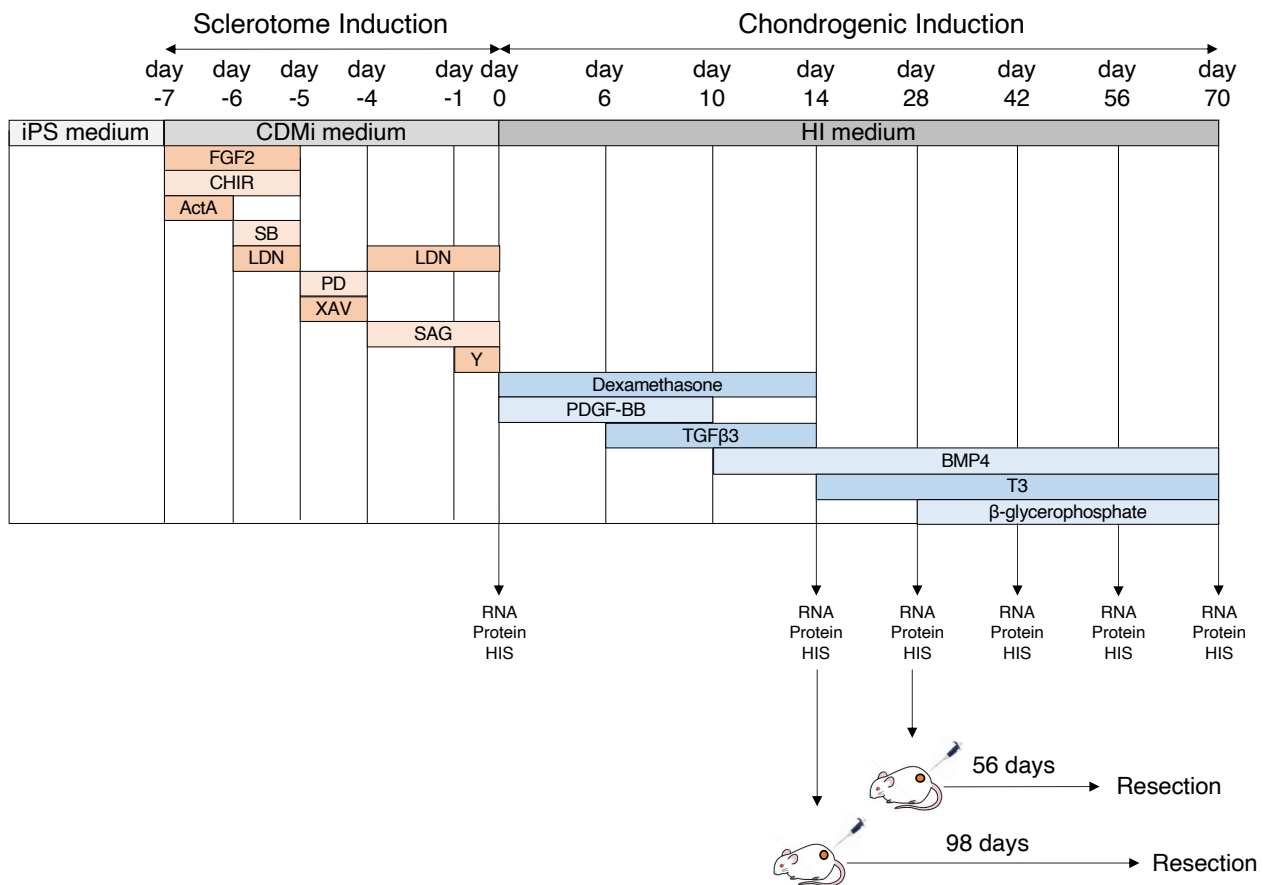

**Figure S2.** Experimental scheme of the in vitro and in vivo analyses. Chondroprogenitor cells are induced from iPSCs via sclerotome induction and differentiated into proliferating and hypertrophic chondrocytes. Samples are collected at each time point and analyzed. For the in vivo analyses, cellular pellets at day 14 and day 28 are transplanted into immunodeficient mice and collected 98 days and 56 days later, respectively.

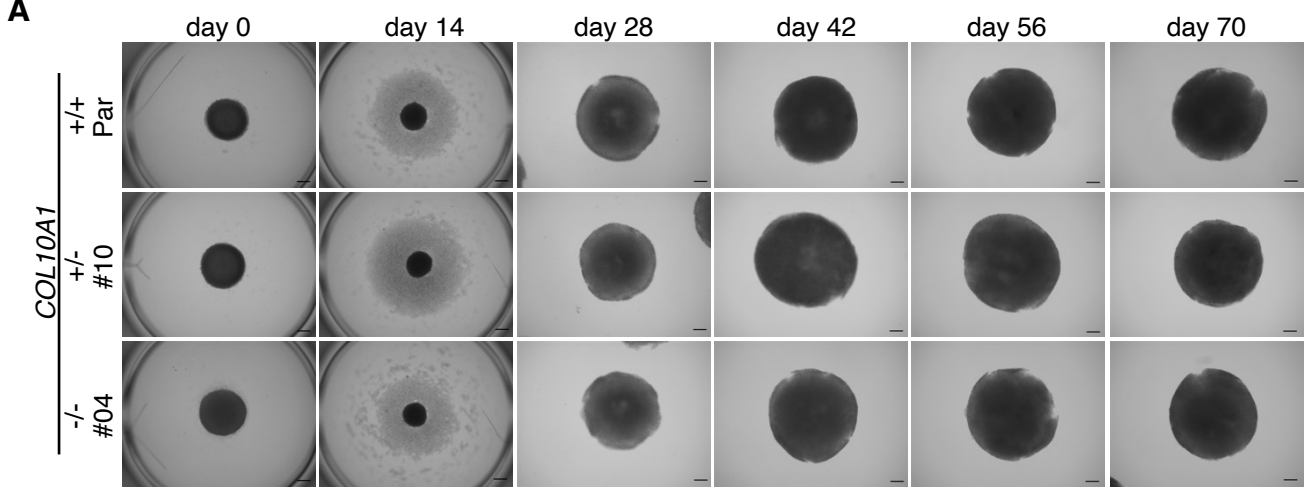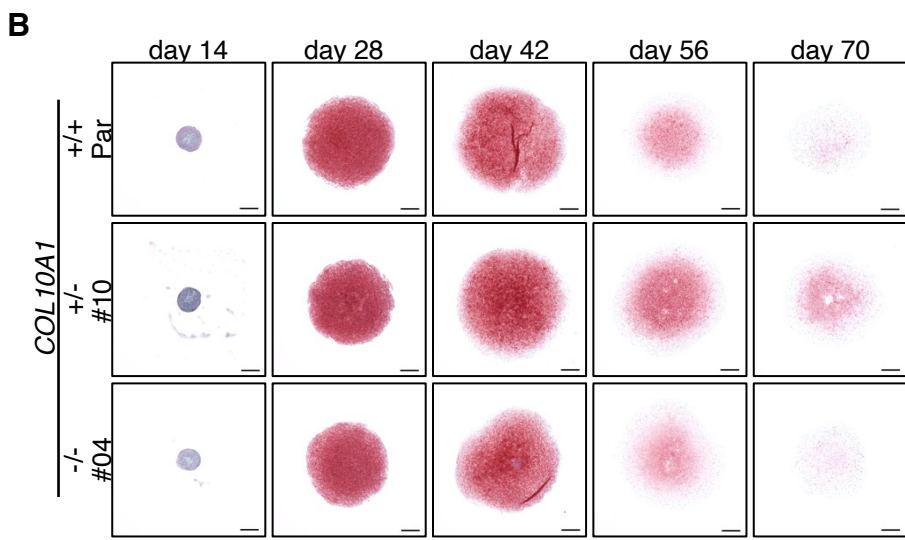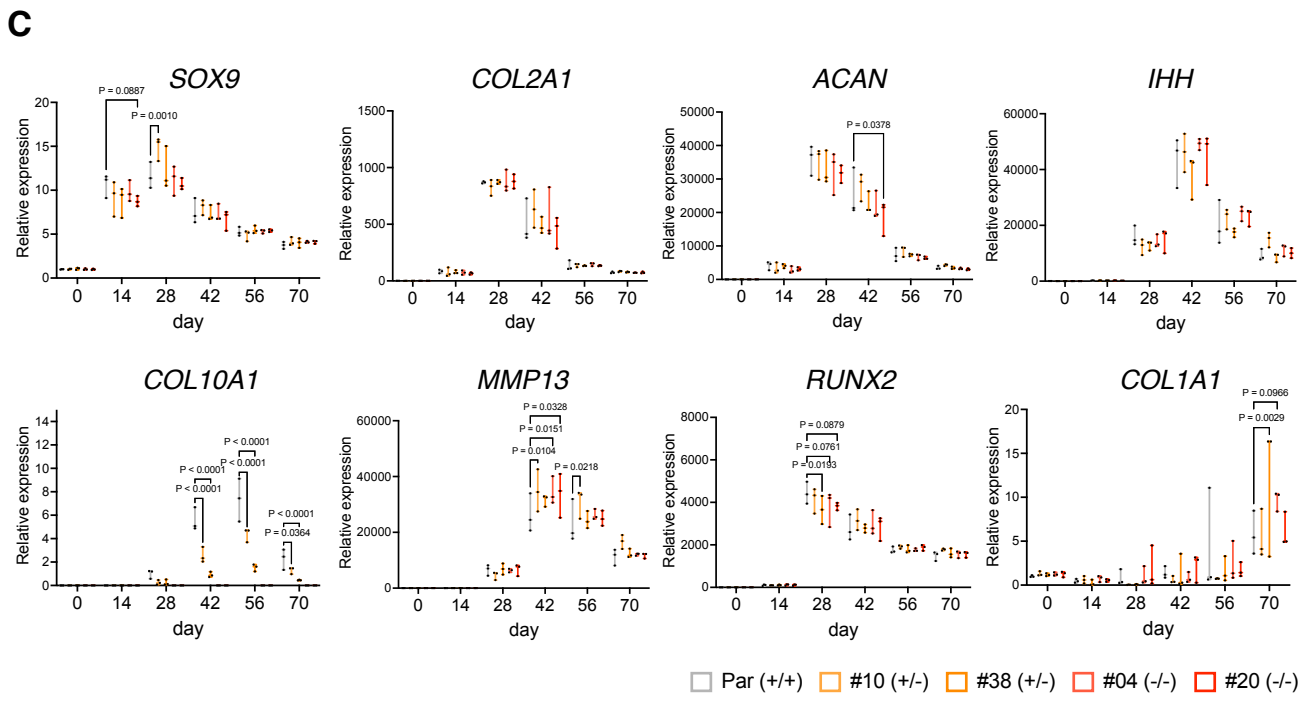

**Figure S3.** Induction of hypertrophic chondrocytes from parental (1231A3), *COL10A1*<sup>+/-</sup>, and *COL10A1*<sup>-/-</sup> iPSC lines. (A) Phase contrast images and (B) Safranin-O and Fast-Green staining of cell pellets at each time point during the induction. Scale bar = 500 μm. Similar results were obtained in three independent experiments. (C) mRNA expression of growth plate-related genes during the induction. RNAs were extracted from 3D chondrocyte pellets at each time point and assessed for the expression of each gene by qRT-PCR. The expression level were normalized to those of parental iPSC-derived pellets at day 0, except *COL10A1*, for which the level at day 28 was used for the normalization. Statistical analysis was performed by Two-way ANOVA. Data are presented as boxplots presenting all points from the minimum to maximum values (n = 3, independent experiments).



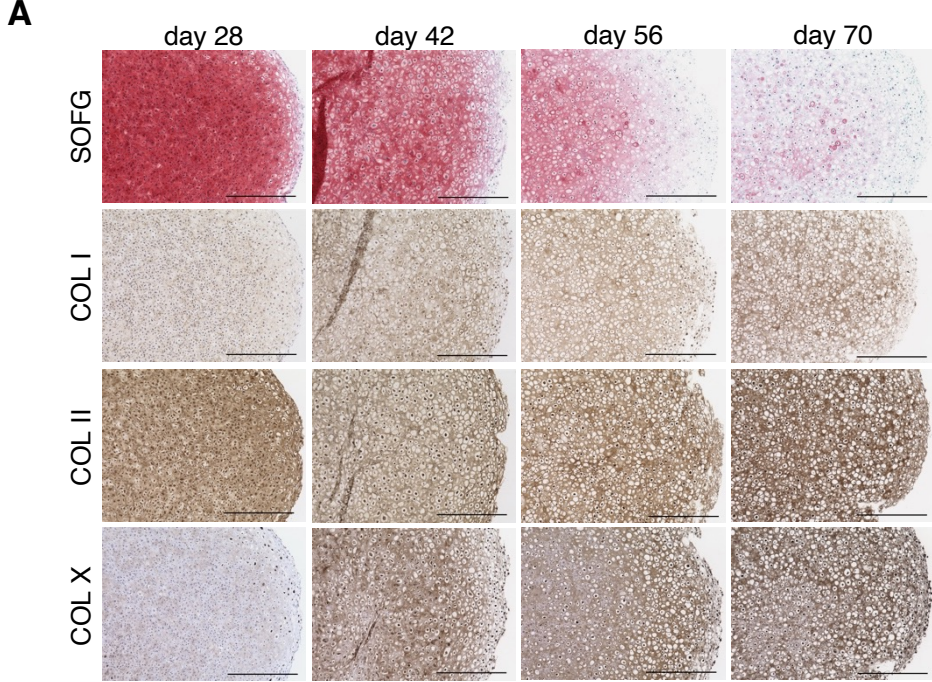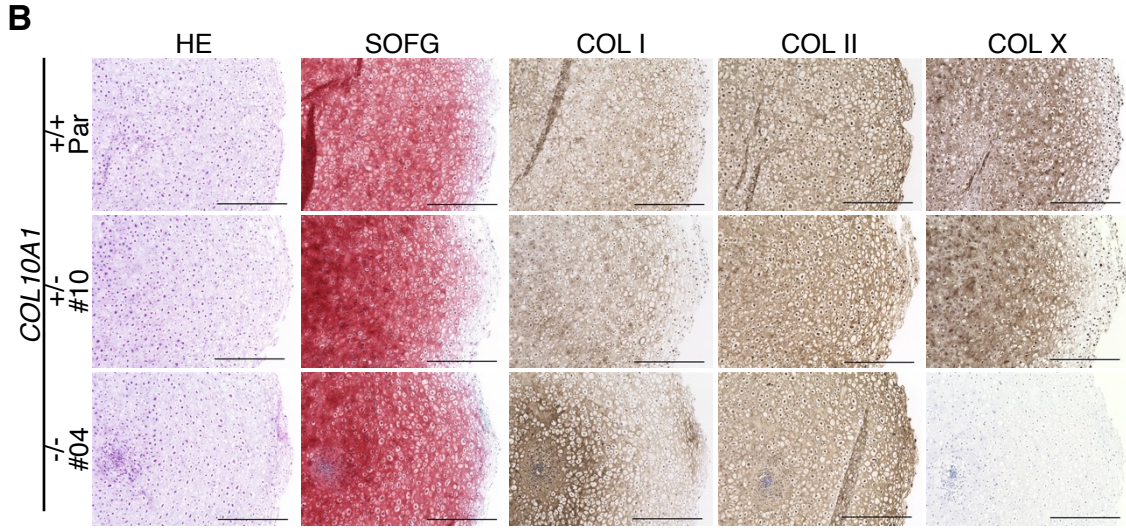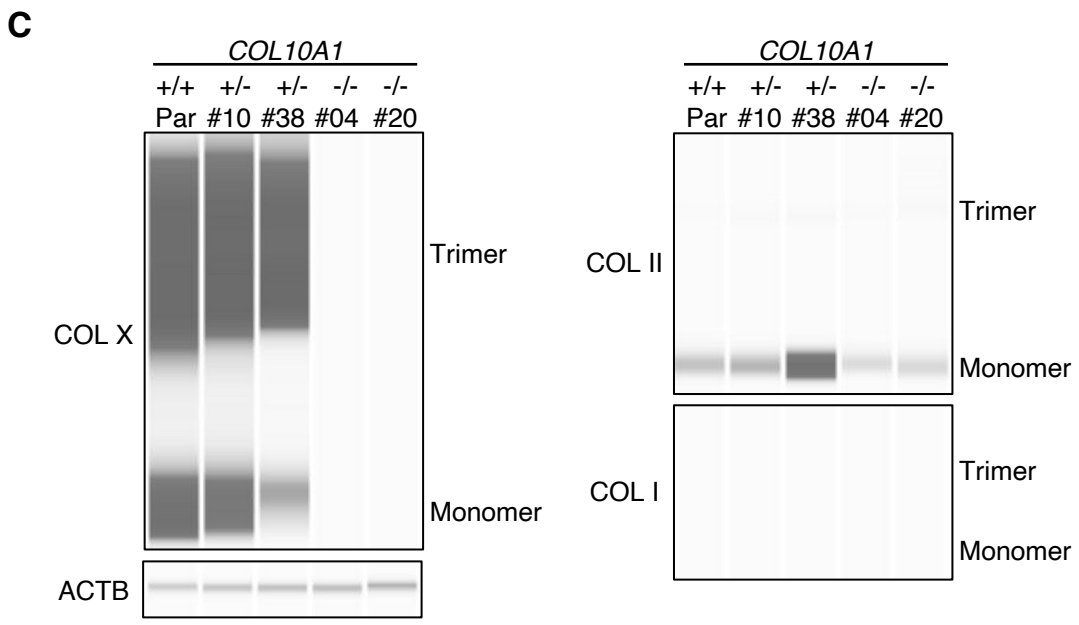

**Figure S4.** Expression of cartilage matrix at day 42 in parental (1231A3), *COL10A1*<sup>+/-</sup>, and *COL10A1*<sup>-/-</sup> iPSC-derived 3D chondrocytes pellets. (A) Histological evaluation of parental iPSC-derived pellets. Cell pellets at each point were stained with Safranin-O and Fast-Green (SFOG), antibodies against COL I, COL II, and COL X. Scale bar = 500 μm. (B) Histological evaluation of parental, *COL10A1*<sup>+/-</sup>, and *COL10A1*<sup>-/-</sup> iPSC derived pellets at day 42. Cell pellets were stained with Hematoxylin-Eosin (HE), SFOG, and antibodies against COL I, COL II, and COL X. Scale bar = 500 μm. (C) Capillary-based immunoassay of protein extracted from cell pellets. The proteins were extracted from the pellets at day 42 and analyzed by Wes using antibodies against COL I, COL II, and COL X. The experiments were performed three times with similar results.

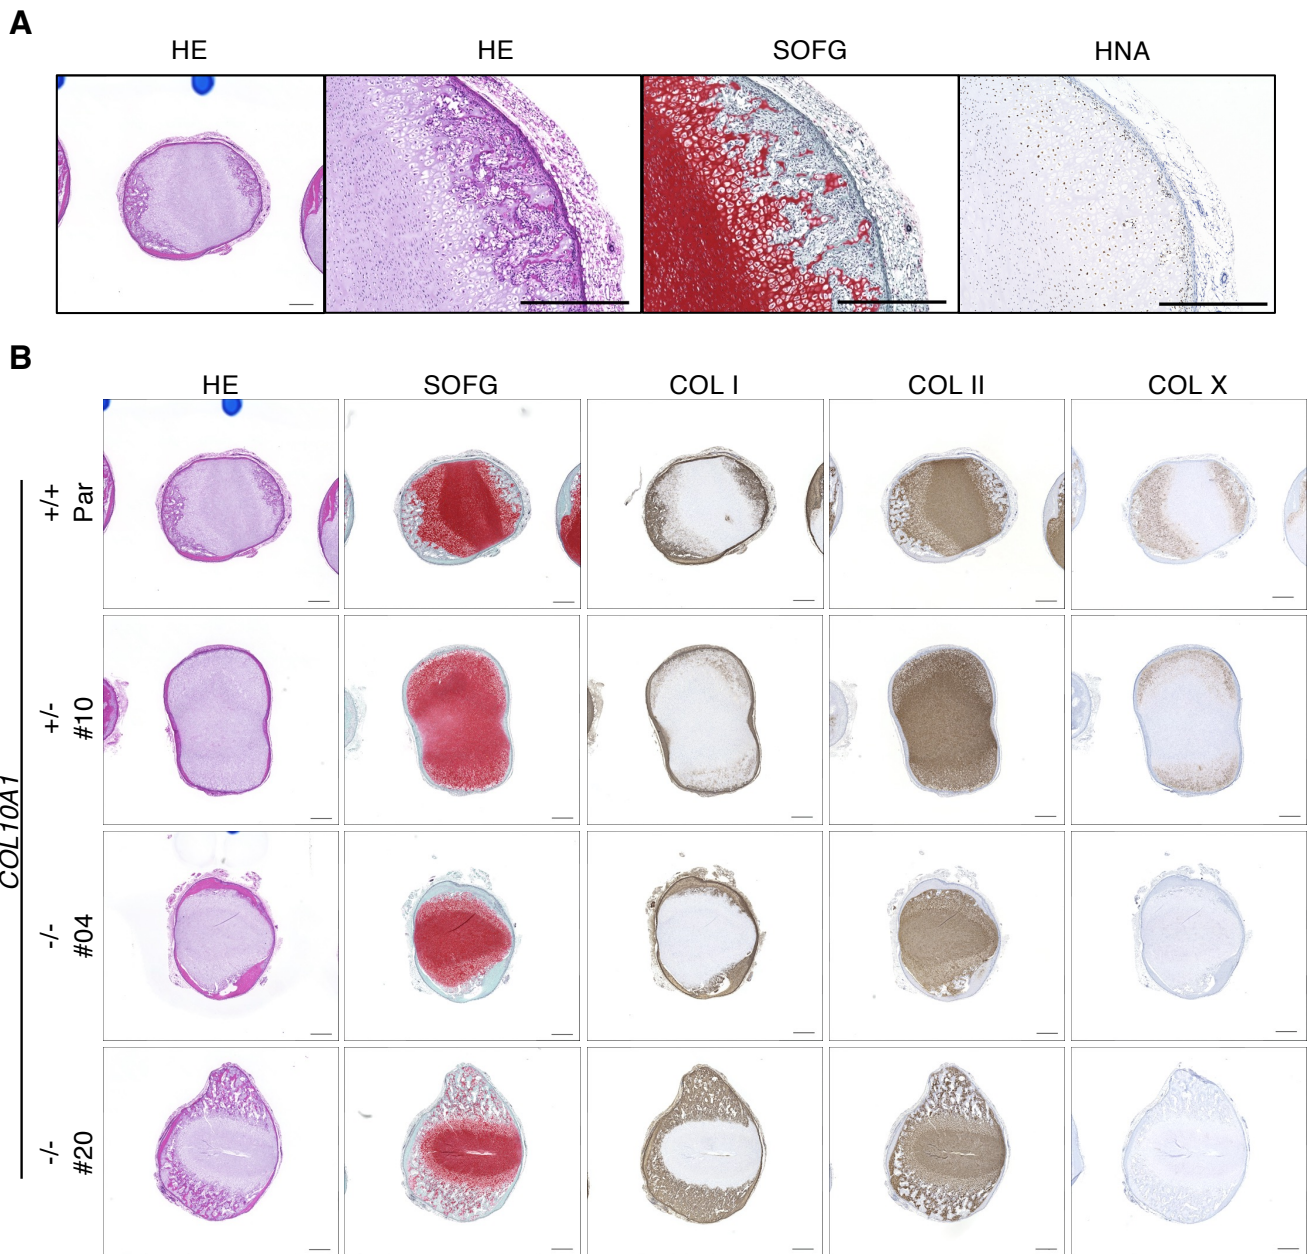

**Figure S5.** Evaluation of chondrocyte pellets at the proliferating stage in vivo. Cell pellets derived from parental (1231A3), *COL10A1*<sup>+/+</sup>, and *COL10A1*<sup>-/-</sup> iPSC lines at day 14 were transplanted into immunodeficient mice and collected 98 days later. (A) Histology of parental iPSC-derived transplants. The collected samples were stained with hematoxylin-eosin (HE), Safranin-O and Fast-Green (SOFG), or an antibody against human nuclear antigen (HNA). Scale bar = 500  $\mu$ m. (B) histology of parental, *COL10A1*<sup>+/+</sup>, and *COL10A1*<sup>-/-</sup> iPSC-derived transplants. The collected samples were stained with HE, SOFG, and antibodies against COL I, COL II, or COL X. Scale bar = 500  $\mu$ m. Similar results were obtained in three independent experiments.

**A**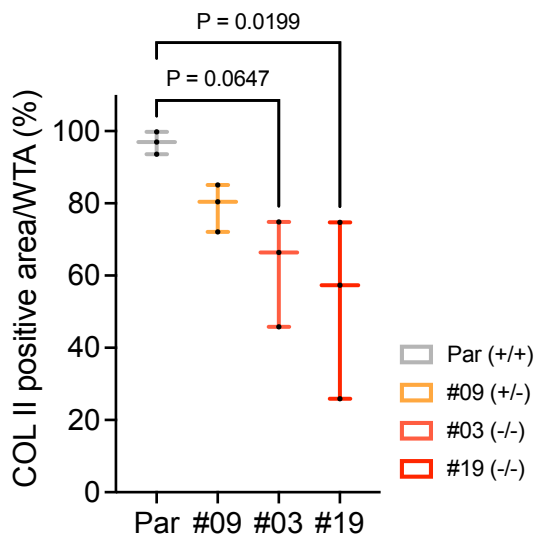**B**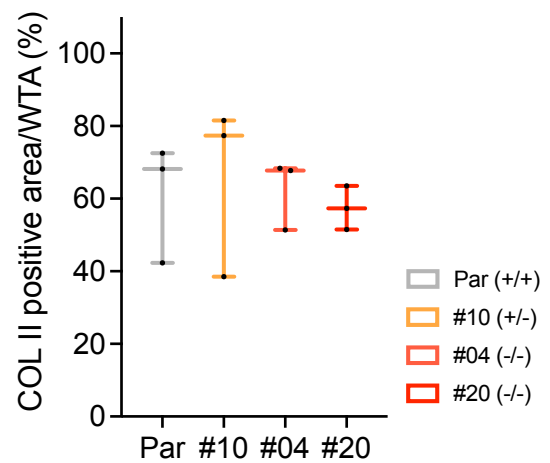

**Figure S6.** Comparison of COL II positive area between parental (*A*, 414C2; *B*, 1231A3) and mutant iPSC-derived transplants. The COL II positive area in each samples shown in Figure 4D (*A*) and S5B (*B*) were quantified by the Hybrid Cell Count Module as described in the Methods. Areas relative to the whole tissue area were shown. Data are presented as boxplots presenting all points from minimum to maximum values (n = 3, independent experiments).



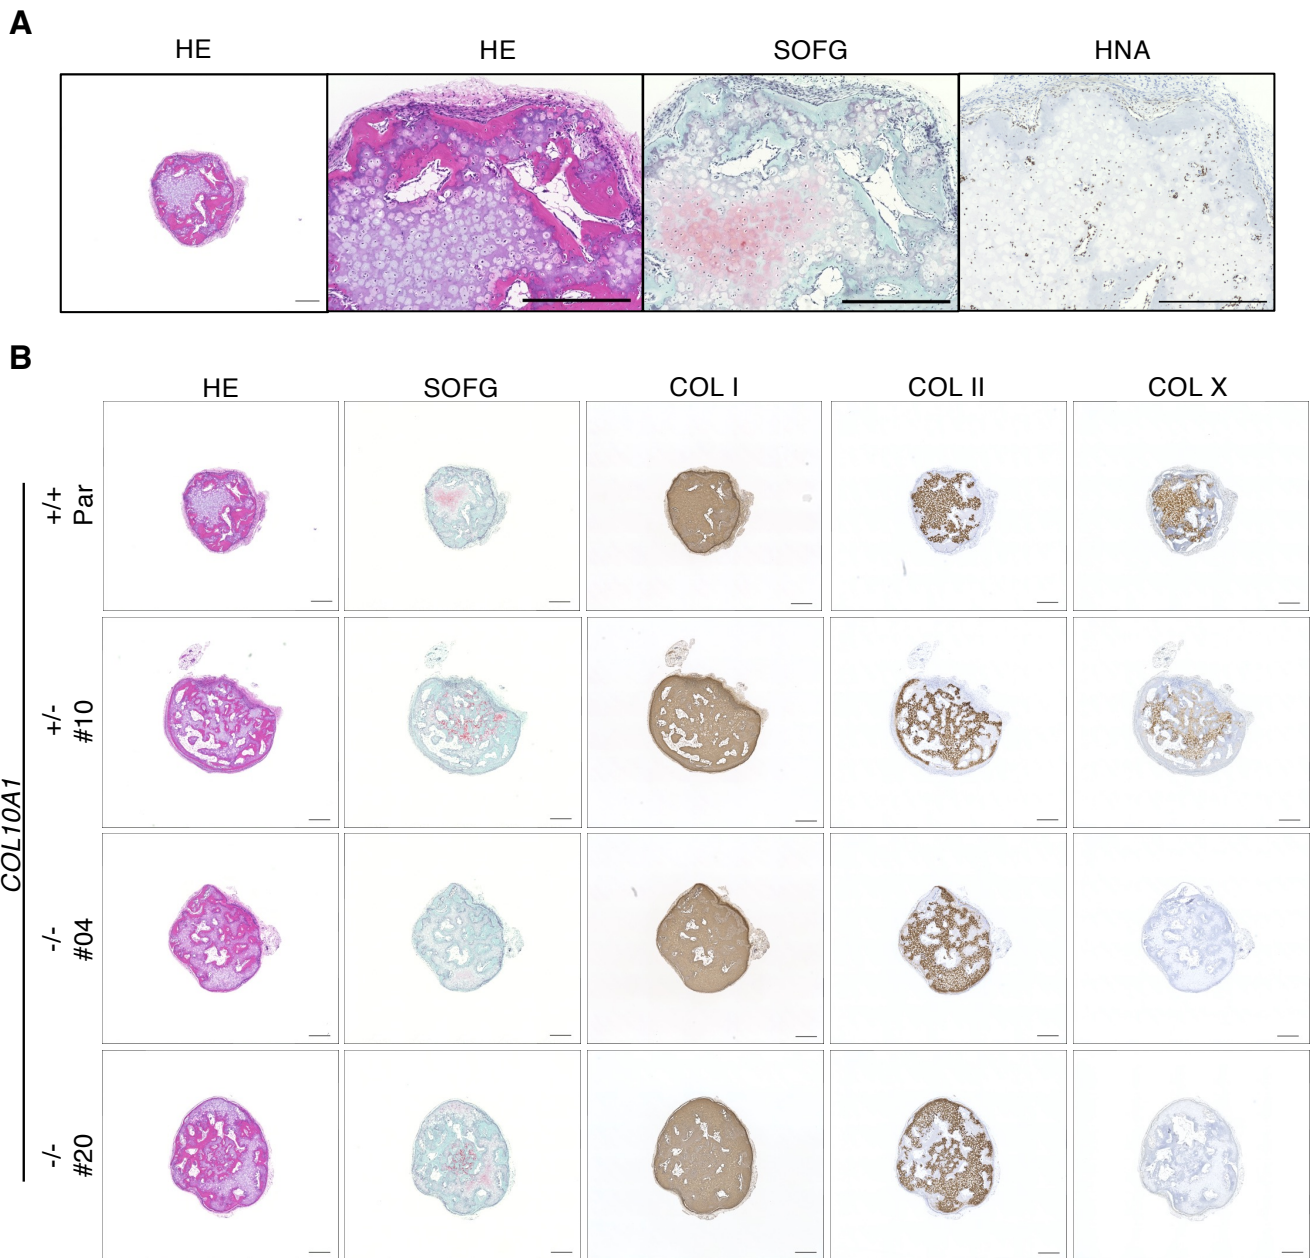

**Figure S7.** Evaluation of chondrocyte pellets at the prehypertrophic stage in vivo. Cell pellets derived from parental (1231A3), *COL10A1*<sup>+/+</sup>, and *COL10A1*<sup>-/-</sup> iPSC lines at day 28 were transplanted into immunodeficient mice and collected 56 days later. (A) Histology of parental iPSC-derived transplants. The collected samples were stained with hematoxylin-eosin (HE), Safranin-O and Fast-Green (SOFG), or an antibody against human nuclear antigen (HNA). Scale bar = 500  $\mu$ m. (B) Histology of parental, *COL10A1*<sup>+/+</sup>, and *COL10A1*<sup>-/-</sup> iPSC-derived transplants. The collected samples were stained with HE, SOFG, and antibodies against COL I, COL II, or COL X. Scale bar = 500  $\mu$ m. Similar results were obtained in three independent experiments.

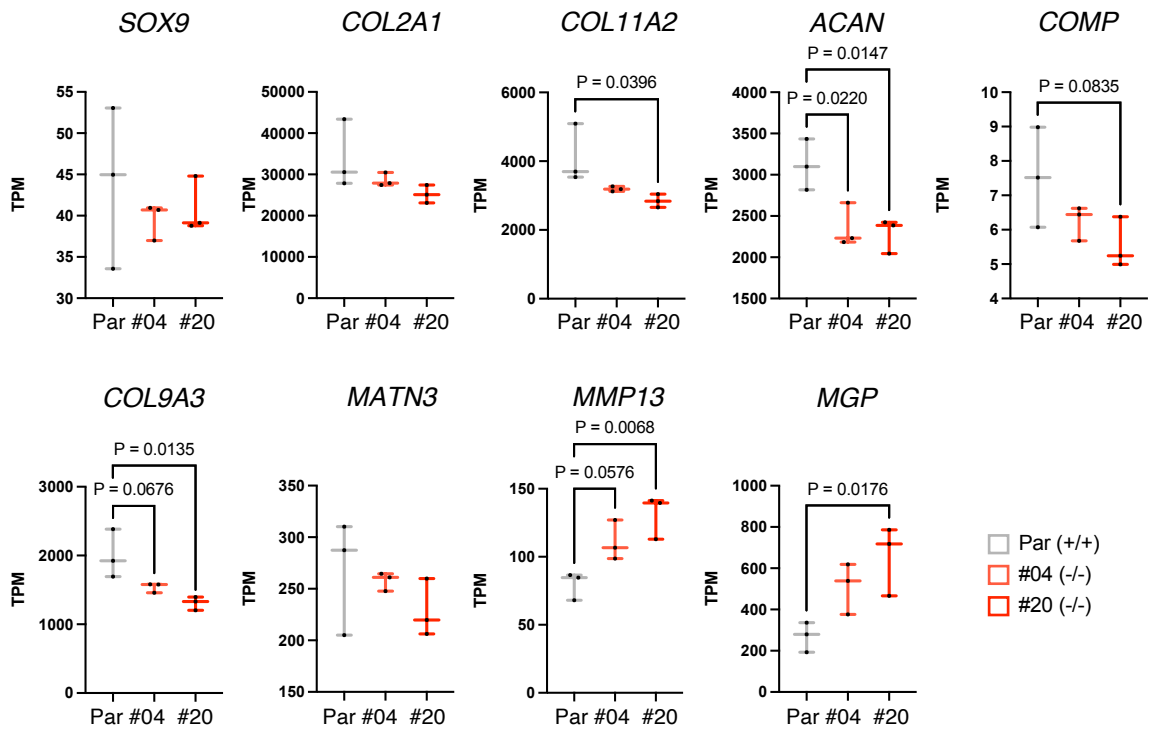

**Figure S8.** mRNA expression levels of growth plate-related genes in parental (1231A3) and *COL10A1*<sup>-/-</sup>-derived pellets. RNAs were extracted from parental and *COL10A1*<sup>-/-</sup> iPSCs-derived pellets at day 42 and processed for RNA sequencing analyses. The expression level of each gene is shown as TPM. Data are presented as boxplots presenting all points from minimum to maximum values (n = 3, independent experiments).

**Supplementary Table S1. Primers for establishment of hiPSCs lacking *COL10A1* gene**

| Application | Target region             | Direction | Sequence                 |
|-------------|---------------------------|-----------|--------------------------|
| sgRNA       | <i>COL10A1</i> N-terminus | Sense     | caccTAGGCACACAAGATCGGGCT |
|             |                           | Antisense | aaacAGCCCGATCTTGTGTGCCTA |
|             | <i>COL10A1</i> C-terminus | Sense     | caccAATGACCCTCGTGGCAGGCG |
|             |                           | Antisense | aaacCGCCTGCCACGAGGGTCATT |
| PCR         | <i>COL10A1</i> N-terminus | Forward   | ATCATTCCACCGTGAACCAG     |
|             |                           | Reverse   | GGCATTGGTATCGTTCAGC      |
|             | <i>COL10A1</i> C-terminus | Forward   | TCAGGACAATGTGGCTCAAG     |
|             |                           | Reverse   | CAGTCTTCTTAGTCCCATTGATGC |
| Seq         | <i>COL10A1</i> N-terminus | Forward   | ATCATTCCACCGTGAACCAG     |
|             |                           | Reverse   | GCAACAGCATTATGACCCAAGG   |
|             | <i>COL10A1</i> C-terminus | Forward   | CCCAGCCGCATTTTTTCACATC   |
|             |                           | Reverse   | CCTACTGTTGGGCAAAGTCATC   |

**Supplementary Table S2. Primers for qRT-PCR**

| Target gene    | Direction | Sequence               |
|----------------|-----------|------------------------|
| <i>ACTB</i>    | Forward   | CACCATTGGCAATGAGCGGTTC |
|                | Reverse   | AGGTCTTTGCGGATGTCCACGT |
| <i>SOX9</i>    | Forward   | GACTTCCGCGACGTGGAC     |
|                | Reverse   | GTTGGGCGGCAGGTA CTG    |
| <i>COL2A1</i>  | Forward   | CGAGGCAACGATGGTCAGCC   |
|                | Reverse   | TGGGGCCTTGTTACCTTTGA   |
| <i>ACAN</i>    | Forward   | TCGAGGACAGCGAGGCC      |
|                | Reverse   | TCGAGGGTGTAGCGTGTAGAGA |
| <i>IHH</i>     | Forward   | CGGTGGACATCACCACATCA   |
|                | Reverse   | CGTGGGCCTTTGACTCGTAA   |
| <i>COL10A1</i> | Forward   | CCCAGCACGCAGAATCCATC   |
|                | Reverse   | AGTGGGCCTTTTATGCCTGT   |
| <i>MMP13</i>   | Forward   | CATGAGTTCGGCCACTCCTT   |
|                | Reverse   | CCTGGACCATAGAGAGACTGGA |
| <i>RUNX2</i>   | Forward   | TTACTTACACCCCGCCAGTC   |
|                | Reverse   | TATGGAGTGCTGCTGGTCTG   |
| <i>COL1A1</i>  | Forward   | GGACACAGAGGTTTCAGTGGT  |
|                | Reverse   | GCACCATCATTTCCACGAGC   |

**Supplementary Table S3. Antibodies for Flow cytometry, Immunohistochemistry and Wes**

| <b>Epitope/Antigen or Product name</b> | <b>Source and Catalog # or RRID</b> | <b>Host species</b> | <b>Application</b> | <b>Dilution</b> | <b>Application specific details</b> |
|----------------------------------------|-------------------------------------|---------------------|--------------------|-----------------|-------------------------------------|
| APC-conjugated DLL1 antibody           | R&D, FAB1818A                       | Mouse               | FACS               | 1:200           | 0.1% BSA in PBS, 30mins at 4°C      |
| APC-conjugated mouse IgG2B             | R&D, IC0041A                        | Mouse               | FACS               | 1:200           | 0.1% BSA in PBS, 30mins at 4°C      |
| Collagen X Monoclonal Antibody (X53),  | Invitrogen,14-9771-82               | Mouse               | IHC                | 1:400           | 1% BSA in PBS, overnight at 4°C     |
| Anti-Nuclei Antibody, clone 3E1.3      | Sigma-Aldrich, MAB4383              | Mouse               | IHC                | 1:250           | 1% BSA in PBS, overnight at 4°C     |
| Goat Anti-Type I Collagen-UNLB         | SouthernBiotech, 1310-01            | Goat                | IHC                | 1:500           | 1% BSA in PBS, overnight at 4°C     |
| Goat Anti-Type II Collagen-UNLB        | SouthernBiotech, 1320-01            | Goat                | IHC                | 1:600           | 1% BSA in PBS, overnight at 4°C     |
| b-Actin (13E5) Rabbit mAb              | CST, #4970                          | Rabbit              | Wes                | 1:200           | Antibody Diluent II, 1hrs RT        |
| Collagen I alpha 1 Antibody            | Novus, NBP1-30054                   | Rabbit              | Wes                | 1:50            | Antibody Diluent II, 1hrs RT        |
| Collagen II Antibody (5B2.5)           | Novus, NB600-844                    | Mouse               | Wes                | 1:50            | Antibody Diluent II, 1hrs RT        |
| Anti-Collagen X antibody [EPR13044]    | abcam, ab182563                     | Rabbit              | Wes                | 1:100           | Antibody Diluent II, 1hrs RT        |

**Supplementary Table S4. Biological Modulators for induction of hypertrophic chondrocytes**

| <b>Modulator</b>     | <b>Source, Catalog # or RRID</b> | <b>Solvent/Vehicle</b> | <b>Concentration</b> |
|----------------------|----------------------------------|------------------------|----------------------|
| BSA                  | SIGMA, A8806                     | Media                  | 5 mg/mL              |
| CD lipid concentrate | gibco, 11905-031                 | Media                  | 1% (v/v)             |
| Apo transferrin      | SIGMA, T1147                     | Media                  | 15 µg/mL             |
| 1-Thioglycerol       | SIGMA, M6145                     | Media                  | 450 µM               |
| Insulin              | Wako, 097-06474                  | 4 mM HCl               | 7 µg/mL              |
| rhFGF2               | Wako, 068-04544                  | 0.1%BSA                | 20 ng/mL             |
| CHIR99021            | AXON, Axon1386                   | DMSO                   | 3 µM / 10 µM         |
| Activin A            | R&D, 338-AC                      | 4 mM HCl with 0.1%BSA  | 50 ng/mL             |
| SB431542             | Selleck Chem, S1067              | DMSO                   | 10 µM                |
| LDN193189            | Stemgent, 04-0074                | DMSO                   | 250 nM / 600 nM      |
| PD173074             | Tocris, 3044                     | DMSO                   | 100 nM               |
| XAV939               | Tocris, 3748                     | DMSO                   | 1 µM                 |
| SAG                  | Calbio, 566661                   | DW                     | 100 nM               |
| Y-27632              | Wako, 034-24024                  | DW                     | 10 µM                |
| ITS premix           | Corning, 354352                  | Media                  | 1% (v/v)             |
| 45% Glucose          | SIGMA, G8769                     | Media                  | 0.15% (w/v)          |



**Supplementary Table S4. Biological Modulators for induction of hypertrophic chondrocytes (Continued)**

| <b>Modulator</b>            | <b>Source, Catalog # or RRID</b> | <b>Solvent/Vehicle</b> | <b>Concentration</b> |
|-----------------------------|----------------------------------|------------------------|----------------------|
| Sodium pyruvate             | SIGMA, S8636                     | Media                  | 1 mM                 |
| GlutaMAX-I                  | gibco, 35050                     | Media                  | 2 mM                 |
| L-ascorbic acid 2-phosphate | SIGMA, A8960                     | DW                     | 170 $\mu$ M          |
| Proline                     | SIGMA, P-5607                    | DW                     | 350 $\mu$ M          |
| Dexamethasone               | Wako, 047-18863                  | DW                     | 100 nM               |
| PDGF-BB                     | R&D, 520-BB                      | 4 mM HCl with 0.1%BSA  | 40 ng/mL             |
| TGF $\beta$ 3               | R&D, 243-B3                      | 4 mM HCl with 0.1%BSA  | 10 ng/mL             |
| BMP4                        | R&D, 314-BP                      | 4 mM HCl with 0.1%BSA  | 50 ng/mL             |
| triiodothyronine (T3)       | SIGMA, T-074                     | Methanol               | 10 nM                |
| $\beta$ -glycerophosphate   | SIGMA, G6501                     | DW                     | 10 mM                |

**Supplementary Table S5. Human iPSC lines**

| <b>Cell line</b> | <b>Source and Catalog# or RRID</b> | <b>Providing Laboratory</b> | <b>Species, cell type</b>    |
|------------------|------------------------------------|-----------------------------|------------------------------|
| 414C2            | CiRA, CVCL_DP60                    | NA                          | Human, feeder free iPS cells |
| 1231A3           | CiRA, CVCL_LJ39                    | NA                          | Human, feeder free iPS cells |

**Supplementary Table S6. Animals for transplantation of 3D chondrocyte pellets**

| <b>Mouse model</b> | <b>Source and Catalog#</b>        | <b>Strain</b>          | <b>Providing Laboratory</b> |
|--------------------|-----------------------------------|------------------------|-----------------------------|
| NOD/ShiJic-scidJcl | CLEA Japan,<br>NOD/ShiJic-scidJcl | NOD.CB17-Prkdcscid/Jcl | NA                          |
